# Supplementary material for: Antibacterial and Anti-Inflammatory Potential of Mouthwash Composition Based on Natural Extracts
Source: MDPI journal article supplement (doi:10.3390/app11094227), 2021-05-06
Supplement: s1 [file s1]

## The Natural Extracts Mixture Ingredients

**Table S1.** Ingredients information (%).

| Raw Material                        | M1      | M2      | M3      | M4      | M5      |
|-------------------------------------|---------|---------|---------|---------|---------|
| Enzyme salt                         | 4~5     | 6~7     | 4~5     | 5~6     | 4~5     |
| <i>Xylitol</i>                      | 45~50   | 55~60   | 57~62   | 45~50   | 45~50   |
| <i>Platycodon grandiflorum</i>      | 9~11    | 0.5~1.6 | 1~3     | 1~3     | 1~3     |
| <i>Chaenomeles sinensis</i> Koehne  | 9~11    | 0.1~1.0 | 0.1~1.0 | 0.1~1.0 | 0.1~1.0 |
| Mint extract powder                 | 10~12   | 12~14   | 13~15   | 13~15   | 13~15   |
| Green tea extract powder            | 8~10    | 10~12   | 10~12   | 15~18   | 15~18   |
| Lemon extract powder                | 4~6     | 6~8     | 9~11    | 14~16   | 14~16   |
| Propolis                            | 0.1~1.0 | 0.1~1.0 | 0.1~1.0 | 0.1~1.0 | 0.1~1.0 |
| <i>Siraitia grosvenorii</i>         | 0.1~1.0 | 0.1~1.0 | 0.1~1.0 | 0.1~1.0 | 0.1~1.0 |
| Maltodextrin                        | 2~5     | -       | -       | -       | -       |
| S.Mg                                | -       | 0.5~1.0 | 1~2     | 1~2     | 1~2     |
| Silicon dioxide (SiO <sub>2</sub> ) | -       | 0.5~1.0 | 1~2     | 1~2     | 1~2     |

## Enzyme Salt Protocol

Enzyme salt was prepared by mixing seal salt (98%) and fermented plant mixture liquid (2%). The fermented plant mixture liquid was mixed in the proportions shown in the following Table S2.

**Table S2.** Ferment plant mixture liquid.

| Raw Material                       | Origin    | Content (%) |
|------------------------------------|-----------|-------------|
| Sterile water                      | -         | 50          |
| <i>Platycodon grandiflorum</i>     | China     | 10          |
| <i>Chaenomeles sinensis</i> Koehne | Korea     | 10          |
| Lemon                              | Korea     | 10          |
| Green tea leaf                     | Korea     | 10          |
| Propolis extract liquid            | Australia | 10          |

Prepare a selective solar salt and put the salt in a rotary heater and dry it. Rotate at 30 °C to 40 °C and sprinkle with Fermented plant mixture liquid to allow it to seep evenly into the salt. Clean the *Platycodon grandiflorum*, *Chaenomeles sinensis* Koehne, lemon, green tea leaf, propolis extract liquid and concentrate it in a ratio of 5:5 with purified water in a vacuum low-temperature (50 °C for 5 hours) fermenter. Filtering the extract with a 45 µm filter. Seal the concentrate and ferment at the incubator at a temperature between 35 °C and 38 °C for 7 days. Seal the salts soaked in the fermented plant mixture liquid, ferment them at 35 °C for three to four days, and dry them. Put dried salt in the grinder, grind them, and subdivide/pack them and ship them.
