# Supplementary material for: Antibacterial and Anti-Inflammatory Potential of Mouthwash Composition Based on Natural Extracts
Source: MDPI journal article supplement (doi:10.3390/app11094227), 2021-05-06
Supplement: s1 [file s1]

Archive with 1 entries (1 files):
- applsci-1201600-supplementary.pdf
